# Supplementary material for: CASP1 Gene Polymorphisms and BAT1-NFKBIL-LTA-CASP1 Gene–Gene Interactions Are Associated with Restenosis after Coronary Stenting
Source: MDPI journal article supplement (doi:10.3390/biom12060765), 2022-05-31
Supplement: s1 [file s1]

**Supplementary Table S1.** rs2239527 C/G, *NFKBIL1* rs2071592 T/A, *LTA* rs1800683 G/A, *CASP1* rs501192 A/G, and *CASP1* rs580253 A/G polymorphisms in CAD patients and healthy controls.

| Polymorphic site<br>(rsID-number) | CAD <i>n</i> = 219 ( <i>n</i> (%)) | Controls <i>n</i> = 617 ( <i>n</i> (%)) | <i>*p</i> |  |
|-----------------------------------|------------------------------------|-----------------------------------------|-----------|--|
| rs2239527 C/G                     |                                    |                                         |           |  |
| Allele                            |                                    |                                         |           |  |
| C                                 | 278 (63.4)                         | 810 (65.6)                              | NS        |  |
| G                                 | 160 (36.5)                         | 424 (34.3)                              |           |  |
| Genotype                          |                                    |                                         |           |  |
| CC                                | 87 (39.7)                          | 272 (44.1)                              | NS        |  |
| CG                                | 104 (47.4)                         | 266 (43.1)                              |           |  |
| GG                                | 28 (12.8)                          | 79 (12.8)                               |           |  |
| rs2071592 T/A                     |                                    |                                         |           |  |
| Allele                            |                                    |                                         |           |  |
| T                                 | 281 (64.1)                         | 811 (65.7)                              | NS        |  |
| A                                 | 157 (35.8)                         | 423 (34.2)                              |           |  |
| Genotype                          |                                    |                                         |           |  |
| TT                                | 89 (40.6)                          | 268 (43.4)                              | NS        |  |
| TA                                | 103 (47.0)                         | 275 (44.6)                              |           |  |
| AA                                | 27 (12.3)                          | 74 (12.0)                               |           |  |
| rs1800683 G/A                     |                                    |                                         |           |  |
| Allele                            |                                    |                                         |           |  |
| G                                 | 275 (62.7)                         | 794 (64.3)                              | NS        |  |
| A                                 | 163 (37.2)                         | 440 (35.6)                              |           |  |
| Genotype                          |                                    |                                         |           |  |
| GG                                | 86 (39.2)                          | 260 (42.1)                              | NS        |  |
| GA                                | 103 (47.0)                         | 274 (44.4)                              |           |  |
| AA                                | 30 (13.7)                          | 83 (13.5)                               |           |  |
| rs501192 G/A                      |                                    |                                         |           |  |
| Allele                            |                                    |                                         |           |  |
| G                                 | 287 (65.5)                         | 823 (67.5)                              | NS        |  |
| A                                 | 151 (34.4)                         | 395 (32.4)                              |           |  |
| Genotype                          |                                    |                                         |           |  |
| GG                                | 101 (46.1)                         | 277 (45.5)                              | 0.040     |  |
| GA                                | 85 (38.8)                          | 269 (44.2)                              |           |  |
| AA                                | 33 (15.0)                          | 63 (10.3)                               |           |  |
| rs580253 A/G                      |                                    |                                         |           |  |
| Allele                            |                                    |                                         |           |  |
| G                                 | 282 (64.4)                         | 821 (67.4)                              | NS        |  |
| A                                 | 156 (35.6)                         | 397 (32.5)                              |           |  |
| Genotype                          |                                    |                                         |           |  |
| GG                                | 99 (45.2)                          | 275 (45.2)                              | 0.011     |  |
| GA                                | 84 (38.3)                          | 271 (44.5)                              |           |  |
| AA                                | 36 (16.4)                          | 63 (10.3)                               |           |  |

Data are shown as n and frequency. \*chi-square test.
